# Supplementary material for: Treatment of Vestibulodynia with Submucosal Injections of IncobotulinumtoxinA into Targeted Painful Points: An Open-Label Exploratory Study
Source: MDPI journal article supplement (doi:10.3390/toxins15080476), 2023-07-25
Supplement: s1 [file s1]

# Supplementary Materials: Treatment of Vestibulodynia with Submucosal Injections of Incobotulinumtoxina into Targeted Painful Points: An Open-Label Exploratory Study

Paula Villa-Muñoz, Monica Albaladejo-Belmonte, Francisco J. Nohales-Alfonso, Jose Alberola-Rubio and Javier Garcia-Casado

**Table S1.** Mean  $\pm$  standard deviation or frequency of occurrence of the categories (%) of the clinical questionnaires, physical examination and RMS of sEMG signals at baseline (PV) and after BoNTA administration (W8, W12, W24), and *p*-values (*p*) obtained when comparing PV vs. {W8, W12, S24}.

| Variable                          | PV                | W8                | <i>p</i> | W12               | <i>p</i> | W24               | <i>p</i> |
|-----------------------------------|-------------------|-------------------|----------|-------------------|----------|-------------------|----------|
| VAS (day-to-day pain)             |                   |                   |          |                   |          |                   |          |
| Provoked                          | 8.09 $\pm$ 1.46   | 5.30 $\pm$ 2.30   | <0.001   | 5.20 $\pm$ 2.46   | <0.001   | 5.20 $\pm$ 2.33   | <0.001   |
| Spontaneous                       | 5.11 $\pm$ 2.22   | 4.07 $\pm$ 2.89   | 0.016    | 3.92 $\pm$ 3.40   | 0.076    | 4.92 $\pm$ 2.54   | 0.233    |
| FSFI                              |                   |                   |          |                   |          |                   |          |
| Desire                            | 2.64 $\pm$ 1.25   | 2.96 $\pm$ 1.37   | 0.174    | 2.89 $\pm$ 1.34   | 0.169    | 2.98 $\pm$ 1.35   | 0.179    |
| Arousal                           | 2.64 $\pm$ 1.92   | 3.27 $\pm$ 1.85   | 0.022    | 3.07 $\pm$ 1.88   | 0.051    | 3.37 $\pm$ 1.62   | 0.019    |
| Lubrication                       | 2.93 $\pm$ 1.93   | 3.61 $\pm$ 1.97   | 0.035    | 3.20 $\pm$ 2.18   | 0.258    | 3.58 $\pm$ 1.68   | 0.134    |
| Orgasm                            | 2.52 $\pm$ 2.16   | 3.53 $\pm$ 2.05   | 0.002    | 3.17 $\pm$ 2.17   | 0.025    | 3.51 $\pm$ 1.85   | 0.004    |
| Satisfaction                      | 3.07 $\pm$ 1.92   | 3.92 $\pm$ 1.72   | 0.013    | 3.74 $\pm$ 1.76   | 0.023    | 3.61 $\pm$ 1.65   | 0.145    |
| Pain                              | 1.54 $\pm$ 1.25   | 2.80 $\pm$ 1.79   | <0.001   | 2.40 $\pm$ 1.95   | <0.001   | 3.21 $\pm$ 1.55   | <0.001   |
| Total                             | 15.31 $\pm$ 8.78  | 20.10 $\pm$ 9.16  | 0.001    | 18.77 $\pm$ 9.95  | 0.006    | 20.26 $\pm$ 8.52  | 0.005    |
| Marinoff's Dyspareunia scale      |                   |                   |          |                   |          |                   |          |
| No pain                           | 3.13              | 6.25              | 0.012    | 6.67              | 0.019    | 10.00             | 0.045    |
| Pain does not prevent intercourse | 21.88             | 50.00             |          | 53.33             |          | 50.00             |          |
| Pain interrupts intercourse       | 40.63             | 34.38             |          | 30.00             |          | 26.67             |          |
| Pain prevents intercourse         | 34.38             | 9.38              |          | 10.00             |          | 13.33             |          |
| HADS                              |                   |                   |          |                   |          |                   |          |
| Anxiety                           | 7.20 $\pm$ 3.52   | 5.03 $\pm$ 3.56   | <0.001   | 6.14 $\pm$ 4.31   | 0.004    | 4.74 $\pm$ 3.70   | <0.001   |
| Depression                        | 4.66 $\pm$ 3.68   | 3.17 $\pm$ 3.08   | 0.005    | 3.26 $\pm$ 3.58   | 0.003    | 2.54 $\pm$ 2.75   | 0.003    |
| Catastrophizing                   | 19.69 $\pm$ 14.47 | 15.68 $\pm$ 10.65 | 0.039    | 14.62 $\pm$ 11.70 | 0.112    | 13.69 $\pm$ 12.29 | 0.041    |
| PGI-I                             |                   |                   |          |                   |          |                   |          |
| Very much better                  |                   | 11.42%            |          | 11.42%            |          | 9.38%             |          |
| Much better                       |                   | 34.29%            |          | 42.86%            |          | 37.50%            |          |
| A little better                   |                   | 34.29%            |          | 25.71%            |          | 28.13%            |          |
| No change                         |                   | 17.14%            |          | 20.00%            |          | 15.63%            |          |
| A little worse                    |                   | 2.86%             |          | 0.00%             |          | 3.13%             |          |
| Much worse                        |                   | 0.00%             |          | 0.00%             |          | 6.25%             |          |
| No. painful points (algometer)    | 5.12 $\pm$ 1.43   | 3.96 $\pm$ 2.40   | 0.038    | 4.22 $\pm$ 2.15   | 0.023    | 3.88 $\pm$ 2.25   | 0.004    |
| Maximum VAS (algometer)           | 7.97 $\pm$ 1.34   | 5.59 $\pm$ 2.97   | <0.001   | 5.73 $\pm$ 2.82   | <0.001   | 5.86 $\pm$ 2.28   | <0.001   |
| PFMH, left side                   |                   |                   |          |                   |          |                   |          |
| None                              | 68.57%            | 66.67%            | 0.879    | 69.70%            | 0.160    | 56.67%            | 0.393    |
| Mild                              | 14.29%            | 15.15%            |          | 3.03%             |          | 6.67%             |          |
| Moderate                          | 11.43%            | 9.09%             |          | 18.18%            |          | 26.67%            |          |
| Severe                            | 5.71%             | 9.09%             |          | 9.09%             |          | 10.00%            |          |
| PFMH, right side                  |                   |                   |          |                   |          |                   |          |
| None                              | 68.57%            | 75.76             | 0.392    | 72.73%            | 0.251    | 76.67%            | 0.081    |
| Mild                              | 11.43%            | 6.06%             |          | 3.03%             |          | 0.00%             |          |
| Moderate                          | 17.14%            | 6.06%             |          | 12.12%            |          | 13.33%            |          |

|                         |             |             |       |             |       |             |       |
|-------------------------|-------------|-------------|-------|-------------|-------|-------------|-------|
| Severe                  | 2.86%       | 12.12%      |       | 12.12%      |       | 10.00%      |       |
| PFM tone, left side     |             |             |       |             |       |             |       |
| Normal                  | 45.71%      | 60.00%      | 0.197 | 51.43%      | 0.593 | 60.00%      | 0.197 |
| Hypertonic              | 54.29%      | 40.00%      |       | 48.57%      |       | 40.00%      |       |
| PFM tone, right side    |             |             |       |             |       |             |       |
| Normal                  | 77.14%      | 77.14%      | 1.000 | 65.74%      | 0.157 | 68.57%      | 0.257 |
| Hypertonic              | 22.86%      | 22.86%      |       | 34.29%      |       | 31.43%      |       |
| RMS (μV)                |             |             |       |             |       |             |       |
| Left side, contraction  | 3.91 ± 1.50 | 3.80 ± 1.52 | 0.681 | 3.83 ± 1.48 | 0.659 | 3.62 ± 1.52 | 0.183 |
| Right side, contraction | 4.00 ± 1.50 | 3.74 ± 1.45 | 0.259 | 3.56 ± 1.44 | 0.007 | 3.53 ± 1.56 | 0.208 |
| Left side, relaxation   | 1.44 ± 0.42 | 1.53 ± 1.04 | 0.478 | 1.48 ± 0.91 | 0.293 | 1.32 ± 0.67 | 0.078 |
| Right side, relaxation  | 1.54 ± 0.73 | 1.50 ± 1.04 | 0.092 | 1.32 ± 0.73 | 0.001 | 1.19 ± 0.49 | 0.100 |
